# Supplementary material
Source: publisher figshare collection journal article supplement (https://karger.figshare.com/articles/dataset/_/5123464)
Supplement: Supplementary file 1 [file 1]

Archive with 7 entries (7 files):
- 000338048_sm_Fig. 1.gif
- 000338048_sm_Fig. 1.tif.org
- 000338048_sm_Fig.1.gif
- 000338048_sm_Figure_1.gif
- 000338048_sm_Legende.pdf
- 000338048_sm_Legende_Fig. 1.docx
- 000338048_sm_Legende_Fig.1.docx
