# Supplementary material
Source: publisher figshare collection journal article supplement (https://karger.figshare.com/articles/dataset/_/5123464)
Supplement: Supplementary file 1 [file 1 › 000338048_sm_Legende_Fig. 1.docx]

**Supplementary fig.1**

Specificity of SIRT1, SIRT2 and SIRT5 antibodies was verified by Western blot in spinal cord tissue homogenates. Protein bands were detected at 80kDa for SIRT1, 40kDa for SIRT2 and 40kDa for SIRT5 as expected.
