# Supplementary material
Source: publisher figshare collection journal article supplement (https://karger.figshare.com/articles/dataset/_/5123464)

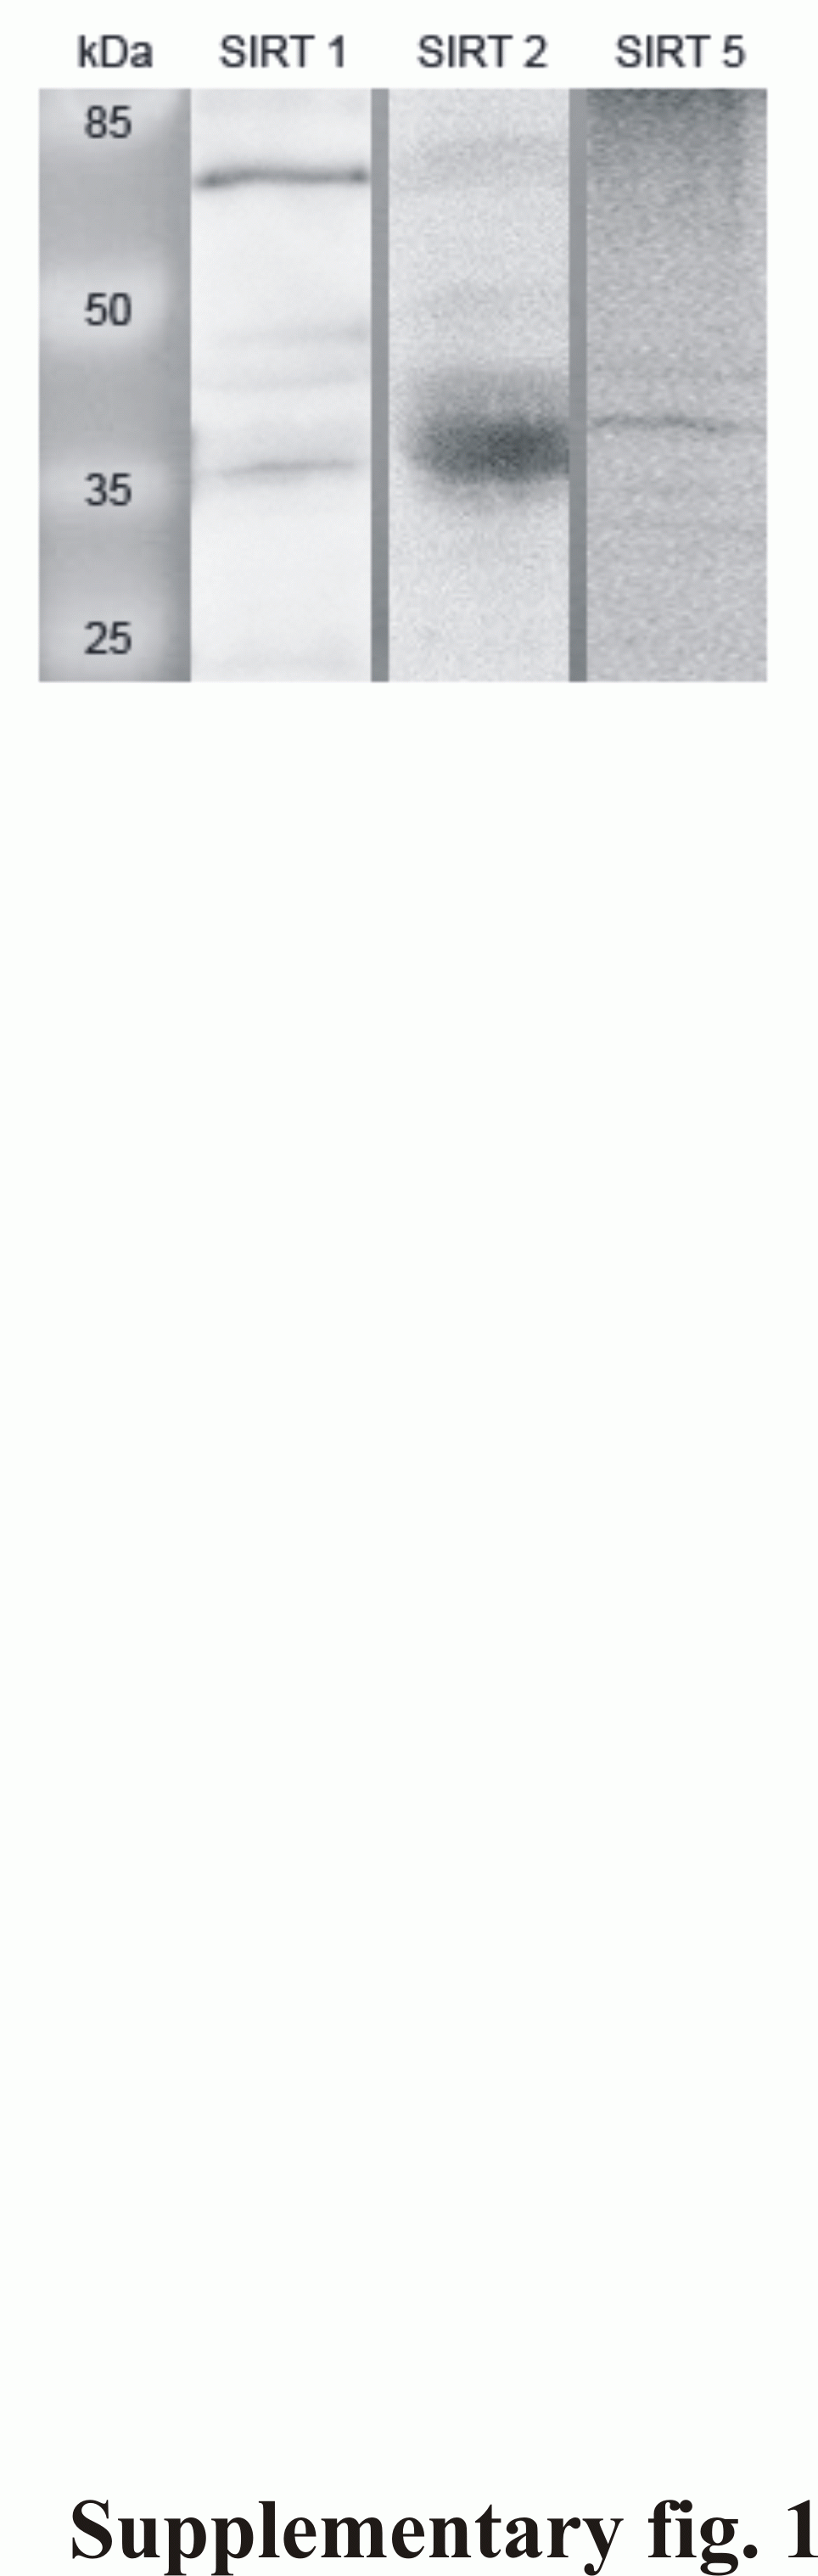

Supplement: Supplementary file 1 [file 1 › 000338048_sm_Fig. 1.gif]

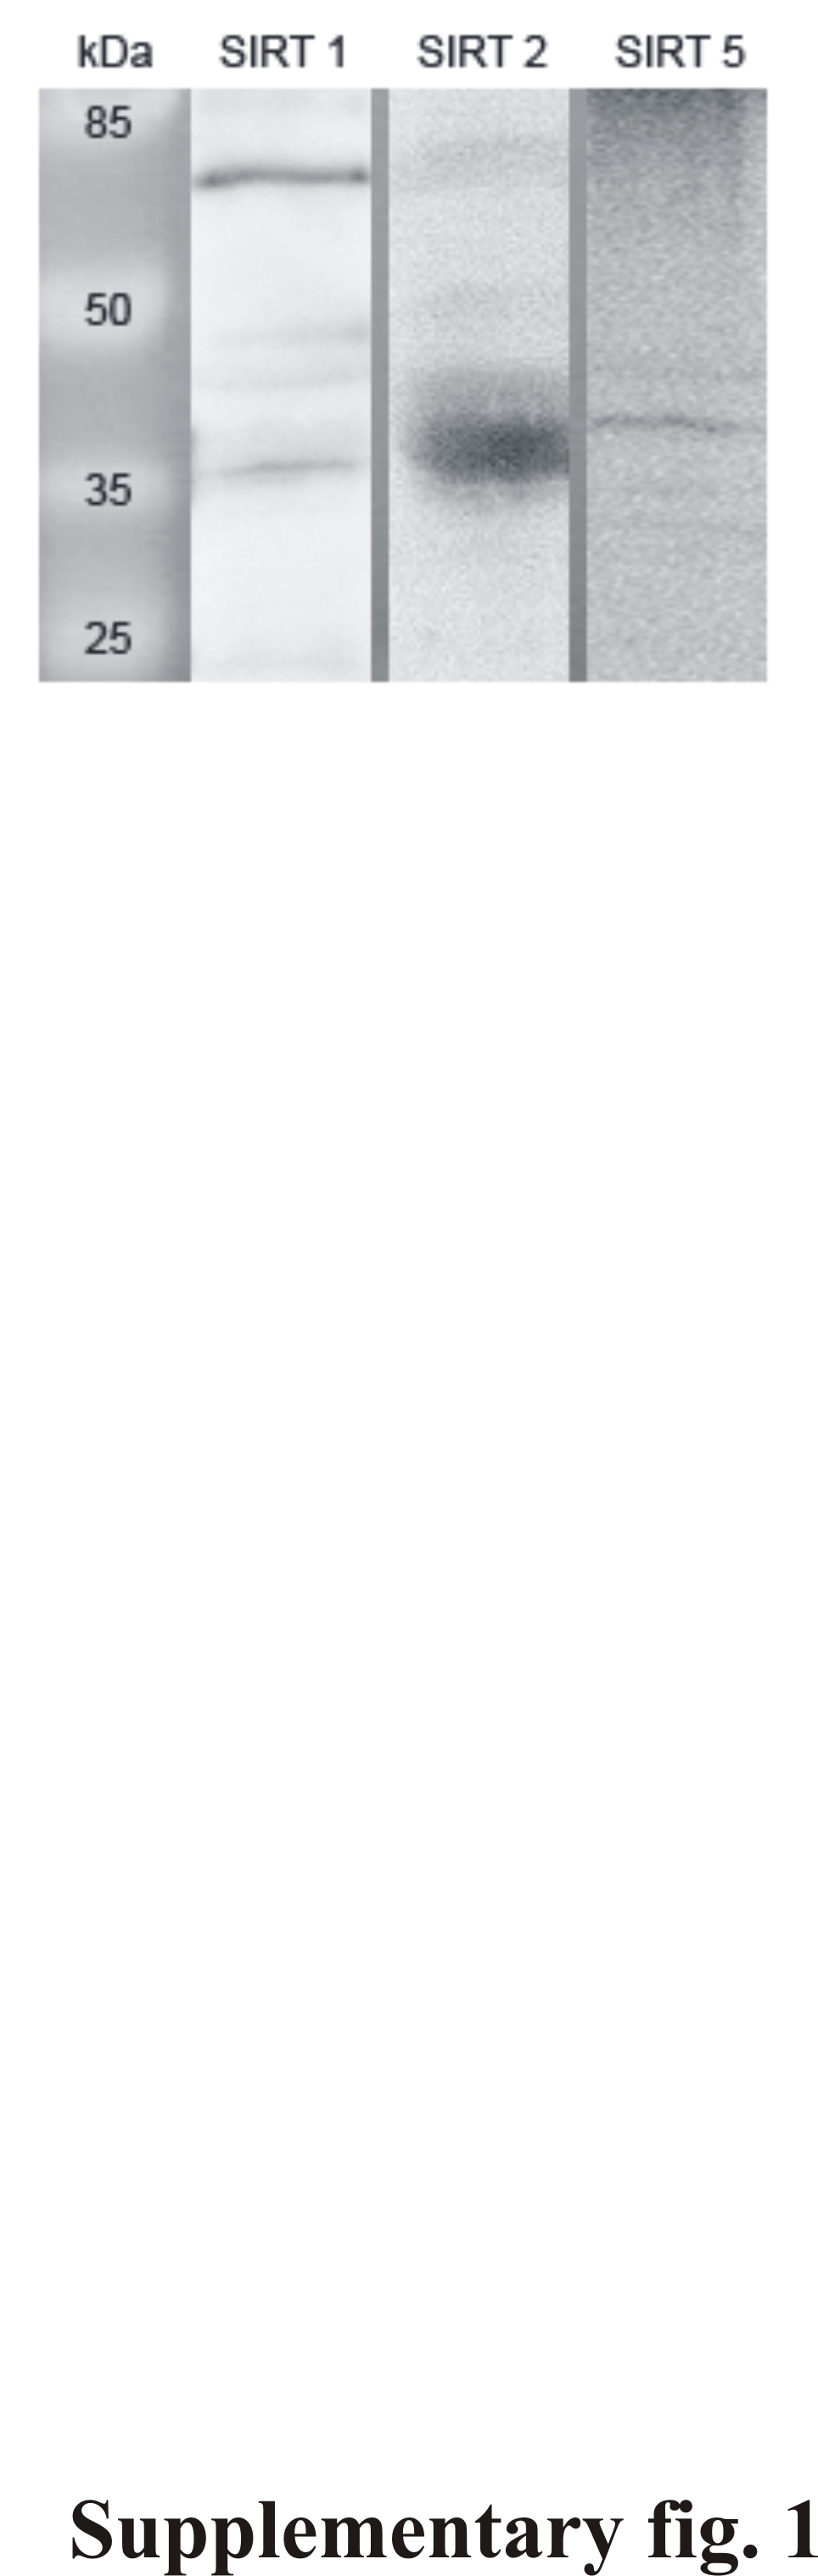

Supplement: Supplementary file 1 [file 1 › 000338048_sm_Fig. 1.tif.org]
